# Supplementary material for: Bacterial pathogens and resistance causing community acquired paediatric bloodstream infections in low- and middle-income countries: a systematic review and meta-analysis
Source: PubMed Central journal article supplement (PMC6937962; doi:10.1186/s13756-019-0673-5), 2019-12-30

# Supplemental Figure. Proportion of Gram positive bacteria (GPB) in paediatric sepsis

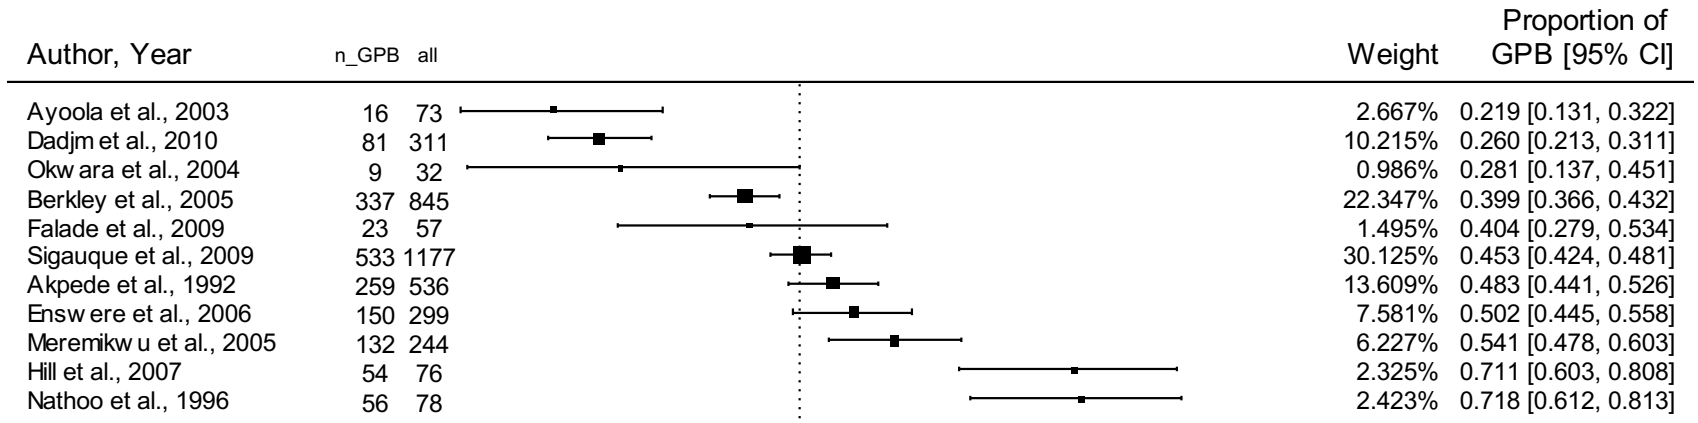

RE Model (Africa)  
 ( $I^2 = 96.77\%$  ,  $P = 1.4718656567719e-24$  ) 0.452 [0.356, 0.549]

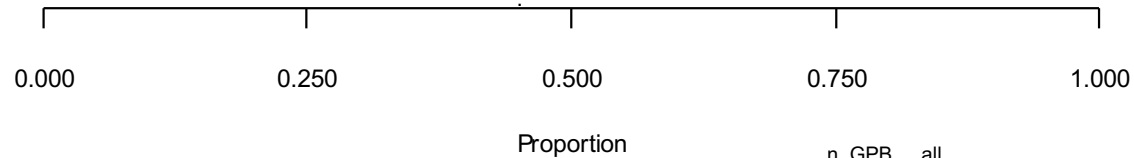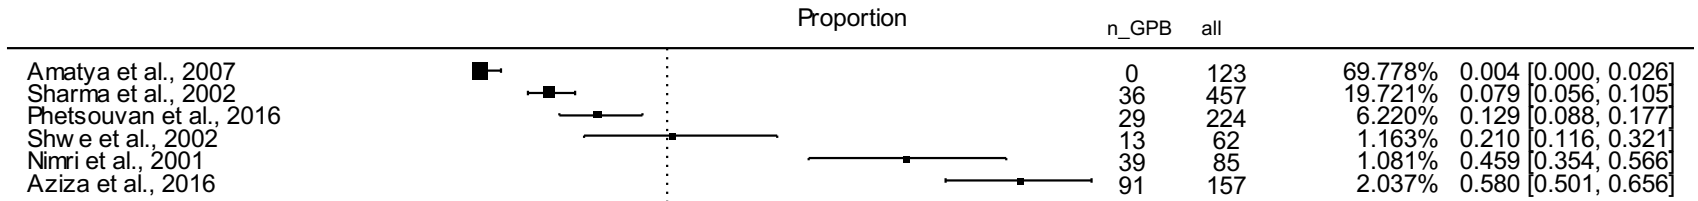

RE Model (Asia)  
 ( $I^2 = 98.22\%$  ,  $P = 2.6637508920911e-52$  ) 0.204 [0.052, 0.419]

RE Model (overall)  
 ( $I^2 = 98.43\%$  ,  $P = 3.82948329557819e-146$  ) 0.358 [0.249, 0.475]

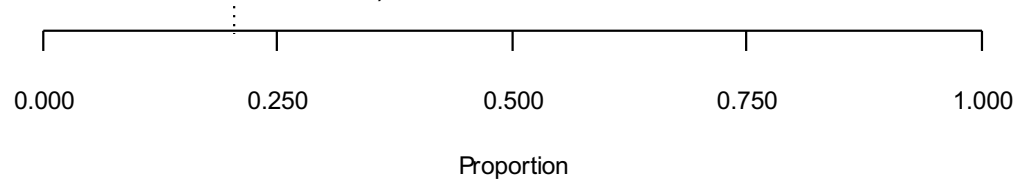

Supplement: 13756_2019_673_MOESM2_ESM.pdf [file 13756_2019_673_MOESM2_ESM.pdf]
